# Supplementary material
Source: PubMed Central journal article supplement (PMC8547988)
Supplement: boe-12-10-6157-s001.pdf [file boe-12-10-6157-s001.pdf]

## Imaging the dynamics of individual processes of microglia in the living retina *in vivo*: supplement

ABY JOSEPH,<sup>1,2,\*</sup>  DEREK POWER,<sup>2</sup> AND JESSE SCHALLEK<sup>2,3,4</sup>

<sup>1</sup>*The Institute of Optics, University of Rochester, Rochester, NY 14620, USA*

<sup>2</sup>*Center for Visual Science, University of Rochester, Rochester, NY 14627, USA*

<sup>3</sup>*Flaum Eye Institute, University of Rochester, Rochester, NY 14642, USA*

<sup>4</sup>*Department of Neuroscience, University of Rochester, Rochester, NY 14642, USA*

\*[aby.joseph39@gmail.com](mailto:aby.joseph39@gmail.com)

---

This supplement published with Optica Publishing Group on 10 September 2021 by The Authors under the terms of the [Creative Commons Attribution 4.0 License](https://creativecommons.org/licenses/by/4.0/) in the format provided by the authors and unedited. Further distribution of this work must maintain attribution to the author(s) and the published article's title, journal citation, and DOI.

Supplement DOI: <https://doi.org/10.6084/m9.figshare.16565871>

Parent Article DOI: <https://doi.org/10.1364/BOE.426157>

# Imaging the dynamics of individual processes of microglia in the living retina *in vivo*: Supplemental document

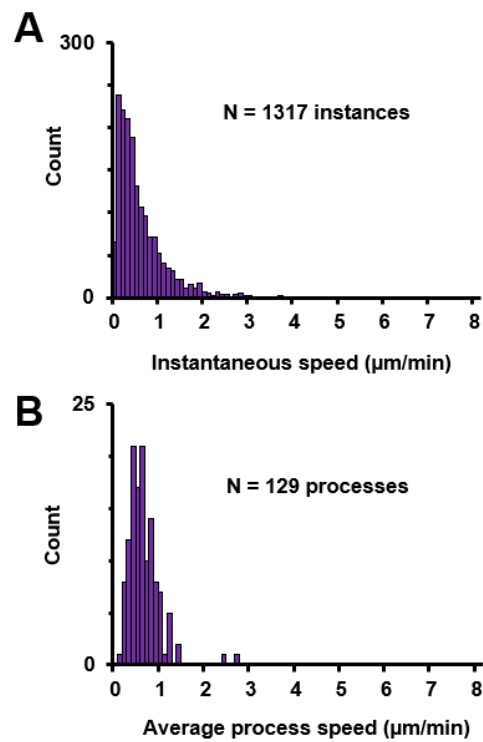

**Fig. S1:** Comparison of instantaneous and average microglial process speeds in the healthy retina, across a population of 7 mice. A) Histogram of instantaneous speeds at each measured instance ( $n=1317$  instances, at 5-minute intervals). B) Histogram of average process speed of each process, averaged across time ( $n=129$  processes).

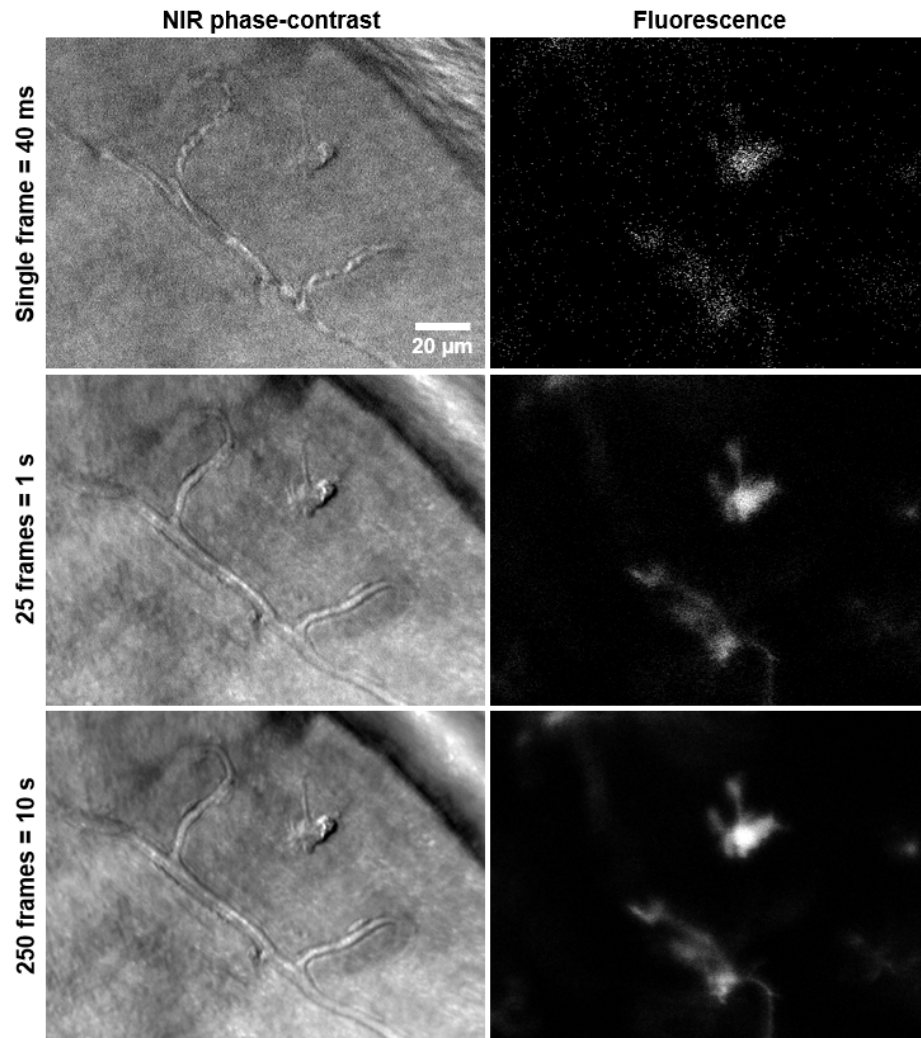

**Fig. S2:** Comparison of image contrast and SNR of NIR label-free (phase-contrast) and fluorescence imaging of EGFP+ cell processes using AOSLO, under three different frame-averaging levels applied.
